# Supplementary material for: Mitochondrial Dysfunction Plus High-Sugar Diet Provokes a Metabolic Crisis That Inhibits Growth
Source: PubMed Central journal article supplement (PMC4728084; doi:10.1371/journal.pone.0145836), 2016-01-26
Supplement: pone.0145836.s004.pdf [file pone.0145836.s004.pdf]

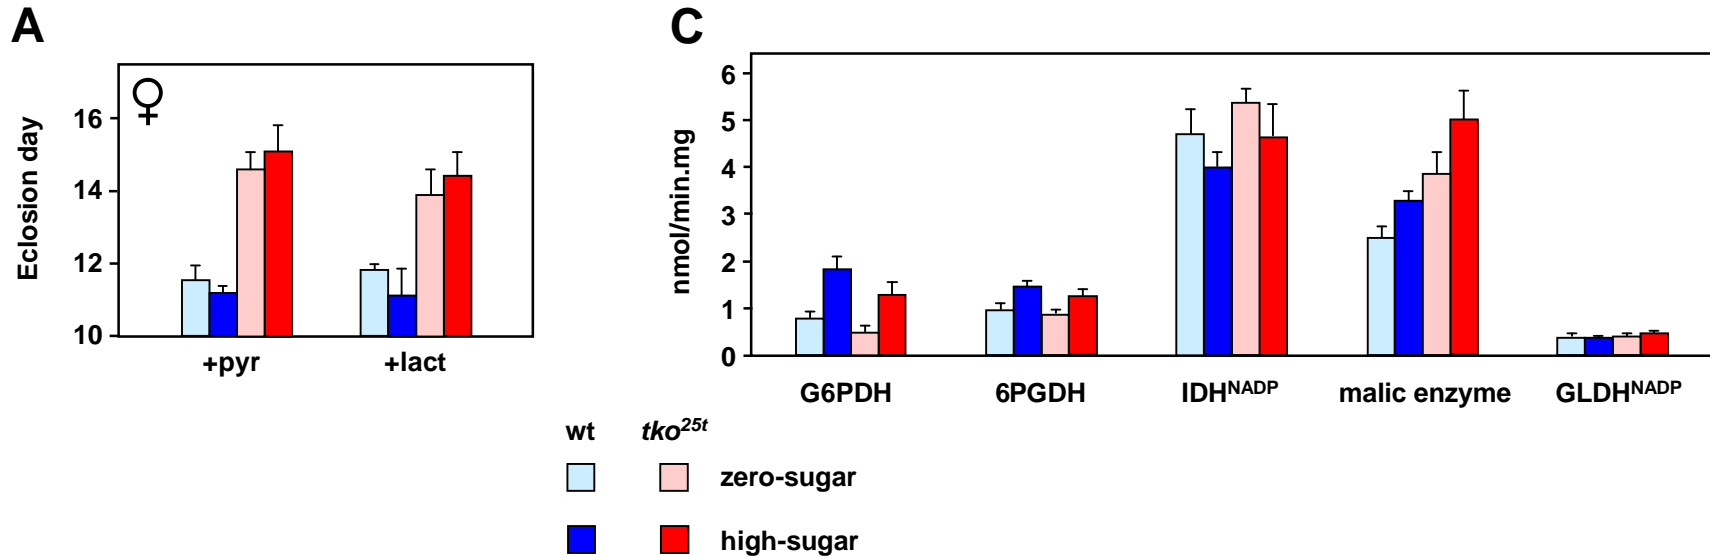

**B**

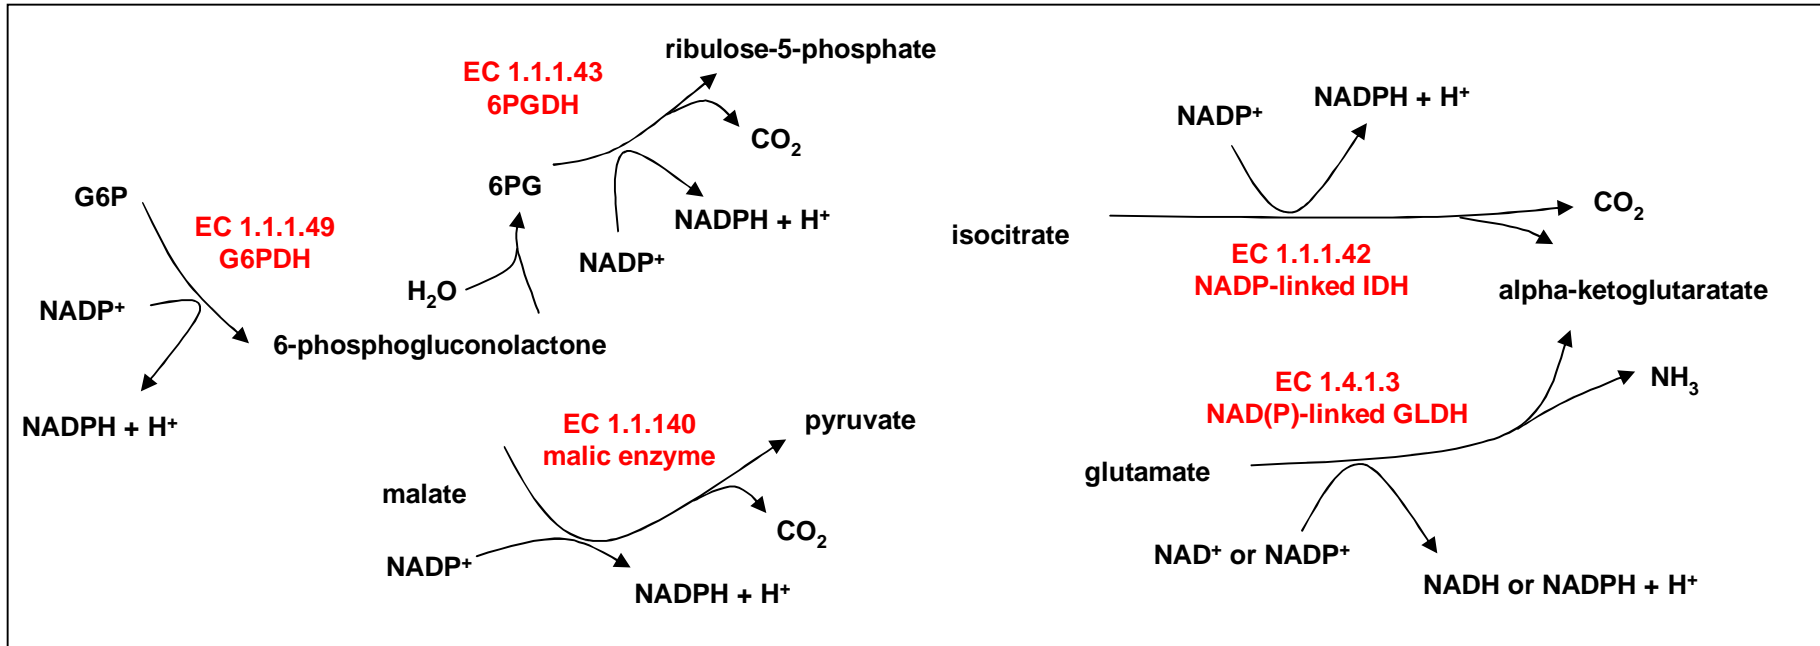

Figure S4, Kemppainen et al, page 1 of 3

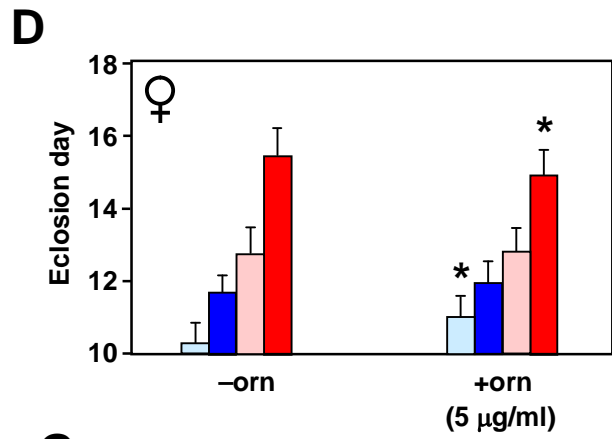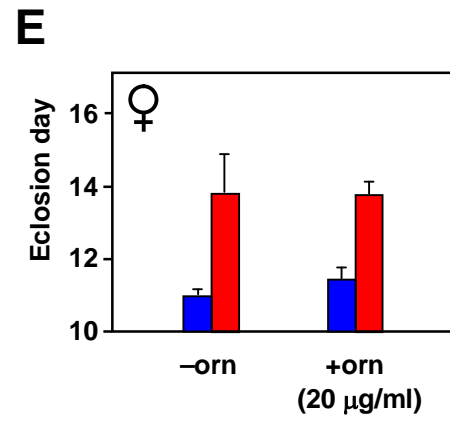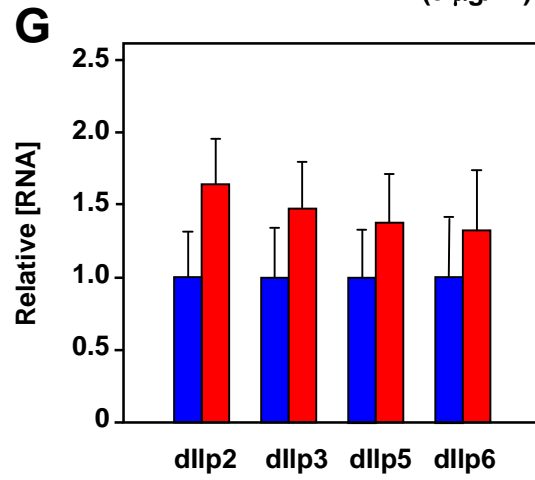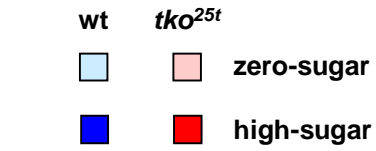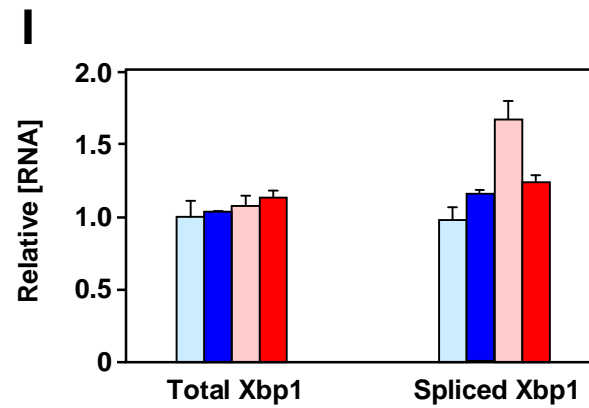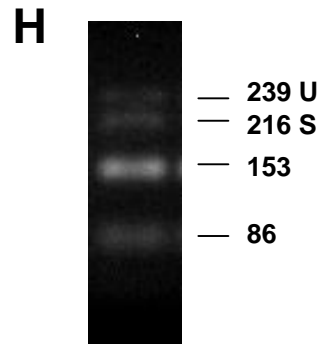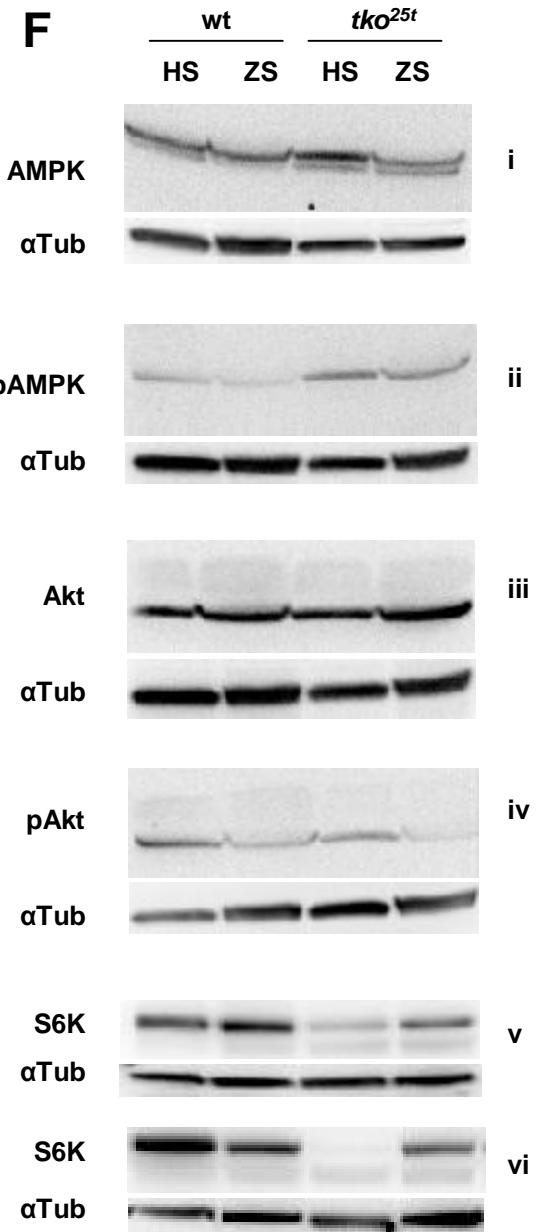

Figure S4, Kemppainen et al, page 2 of 3

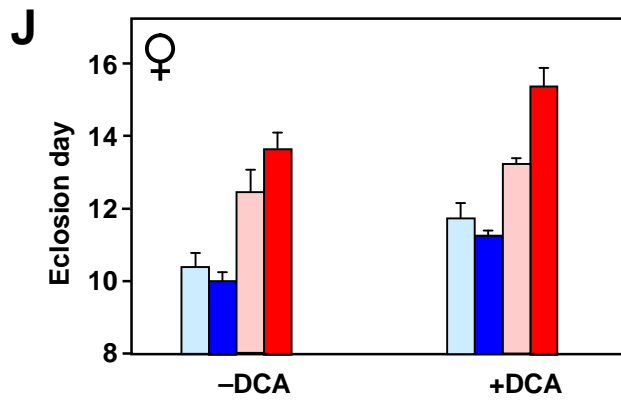

Figure S4, Kemppainen et al, page 3 of 3
